# Supplementary material for: Intermittent prednisone treatment in mice promotes exercise tolerance in obesity through adiponectin
Source: PubMed Central journal article supplement — J Exp Med. 2022 Apr 1;219(5):e20211906. doi: 10.1084/jem.20211906 (PMC8980841; doi:10.1084/jem.20211906), 2022-04-01
Supplement: JEM_20211906_SourceDataF5.pdf [file JEM_20211906_SourceDataF5.pdf]

high-fat diet    normal diet

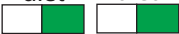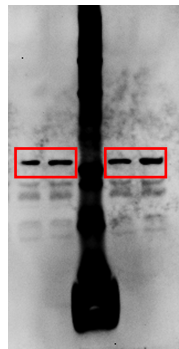

AdipoR1

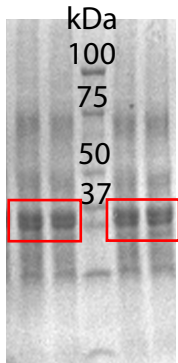

loading control  
(ponceau)

ND    HFD

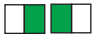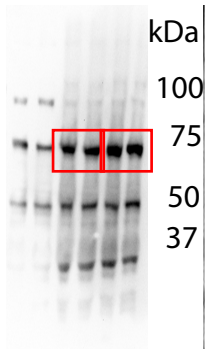

AMPK $\alpha$

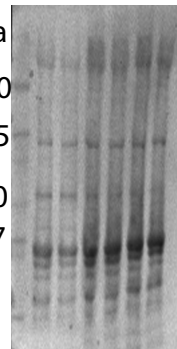

loading control  
(ponceau)

ND    HFD

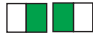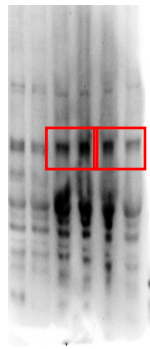

p-AMPK $\alpha$   
(Thr172)

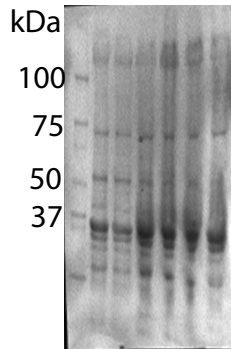

loading control  
(ponceau)

Fig. 5A
