# Supplementary figures and images for: Intermittent prednisone treatment in mice promotes exercise tolerance in obesity through adiponectin
Source: PubMed Central journal article supplement — J Exp Med. 2022 Apr 1;219(5):e20211906. doi: 10.1084/jem.20211906 (PMC8980841; doi:10.1084/jem.20211906), 2022-04-01

Fig. 3A

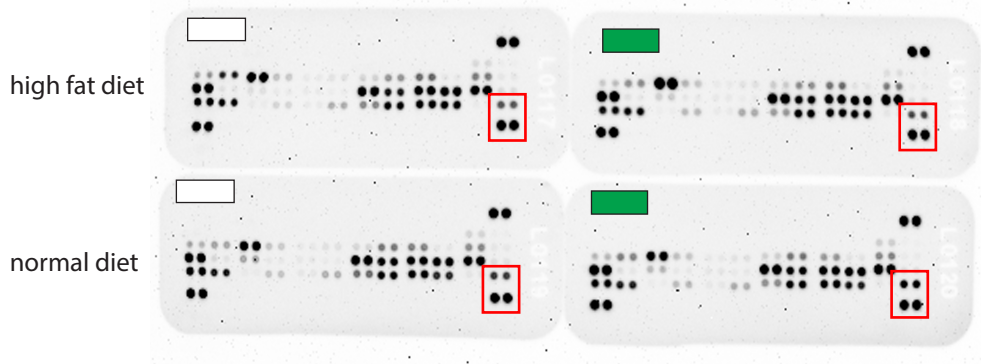

Fig. 3D

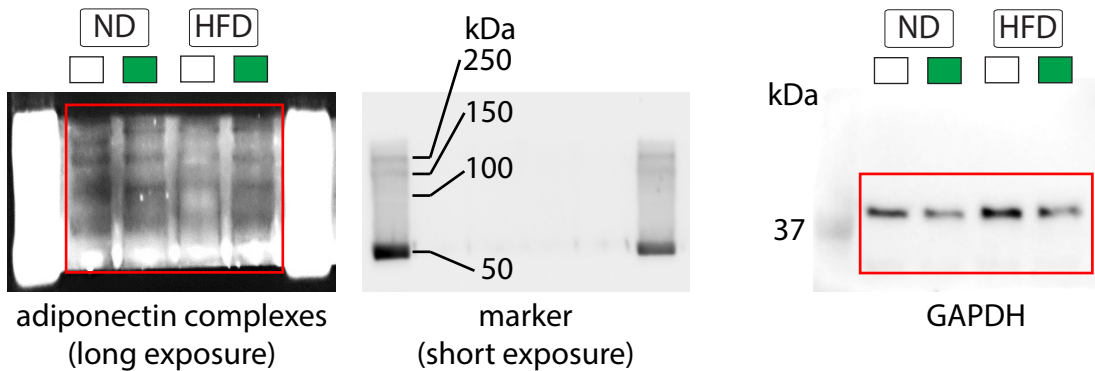

Supplement: JEM_20211906_SourceDataF3.pdf [file JEM_20211906_SourceDataF3.pdf]

Fig. 4A

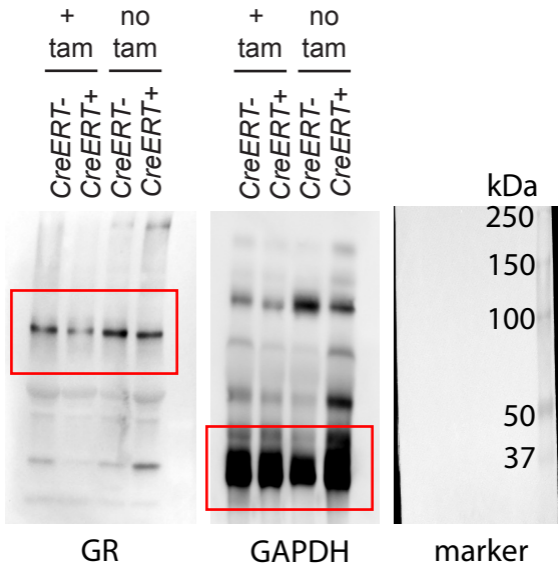

Supplement: JEM_20211906_SourceDataF4.pdf [file JEM_20211906_SourceDataF4.pdf]
